# Supplementary material for: Development of a near infrared novel bioimaging agent via co-oligomerization of Congo red with aniline and o-phenylenediamine: experimental and theoretical studies
Source: Royal Society of Chemistry journal article supplement (doi:10.1039/c9ra05814a), 2019-01-01
Supplement: c9ra05814a1.pdf [file c9ra05814a1.pdf]

## Supporting information

### **Development of Near Infrared Novel Bioimaging Agent via Co-oligomerization of Congo Red with Aniline and o-phenylenediamine: Experimental and Theoretical Studies**

Neetika Singh<sup>a</sup>, Prabhat Kumar<sup>b</sup> Raj Kumar<sup>c</sup>, Elham A. Aazam<sup>d</sup> and Ufana Riaz<sup>\*a</sup>

<sup>a</sup> Materials Research Laboratory Department of Chemistry, Jamia Millia Islamia, New Delhi-110025, India, <sup>b</sup> Advanced Instrumentation Research Facility, Jawaharlal Nehru University, New Delhi- 110067, <sup>c</sup> School of Life Sciences, Jawaharlal Nehru University, New Delhi- 110067, <sup>d</sup> Chemistry Department, Faculty of Science, King Abdul Aziz University, Jeddah 23622, Saudia Arabia

\*Corresponding author email: [ufana2002@yahoo.co.in](mailto:ufana2002@yahoo.co.in)

**Table S1 Intrinsic Viscosity and average molar mass of PCR, PCR-co-PANI, and PCR-co-POPD**

| <b>Homopolymer/copolymers</b> | <b>Intrinsic viscosity (<math>\eta</math>)</b> | <b>Viscosity average molar mass (<math>M_v</math>)</b> |
|-------------------------------|------------------------------------------------|--------------------------------------------------------|
| PCR                           | 0.11                                           | $5117 \pm 3$                                           |
| PCR-co-PANI                   | 0.13                                           | $6179 \pm 2$                                           |
| PCR-co-POPD                   | 0.15                                           | $6814 \pm 2$                                           |

(a)

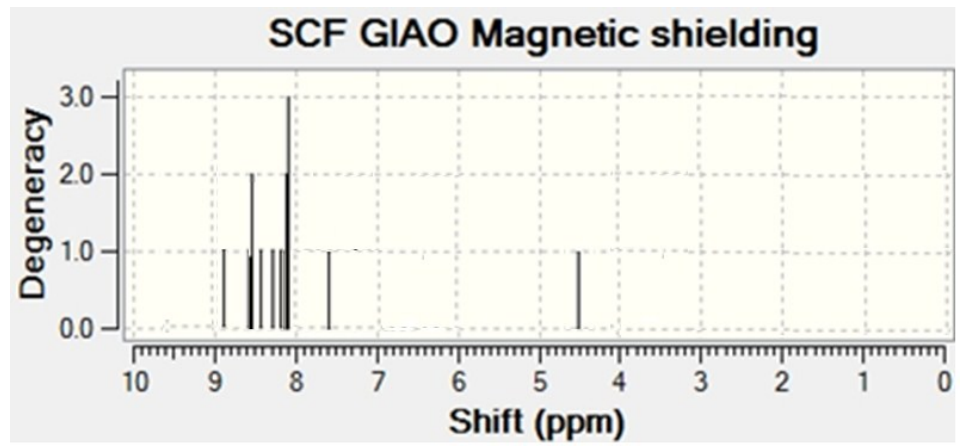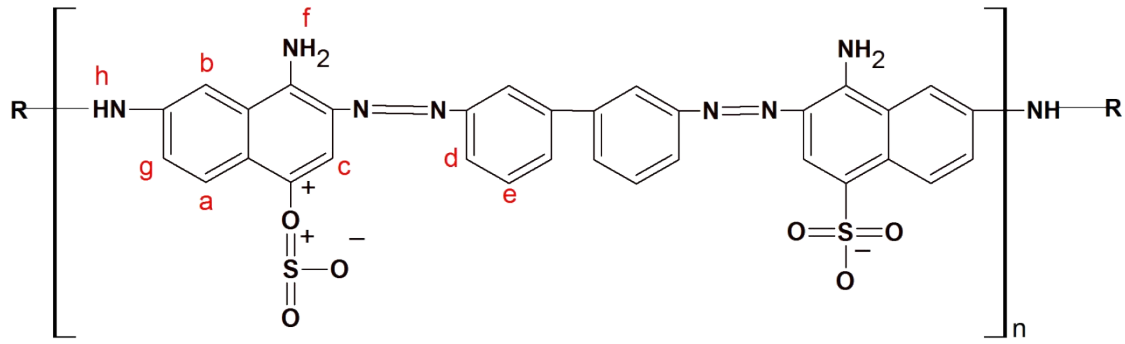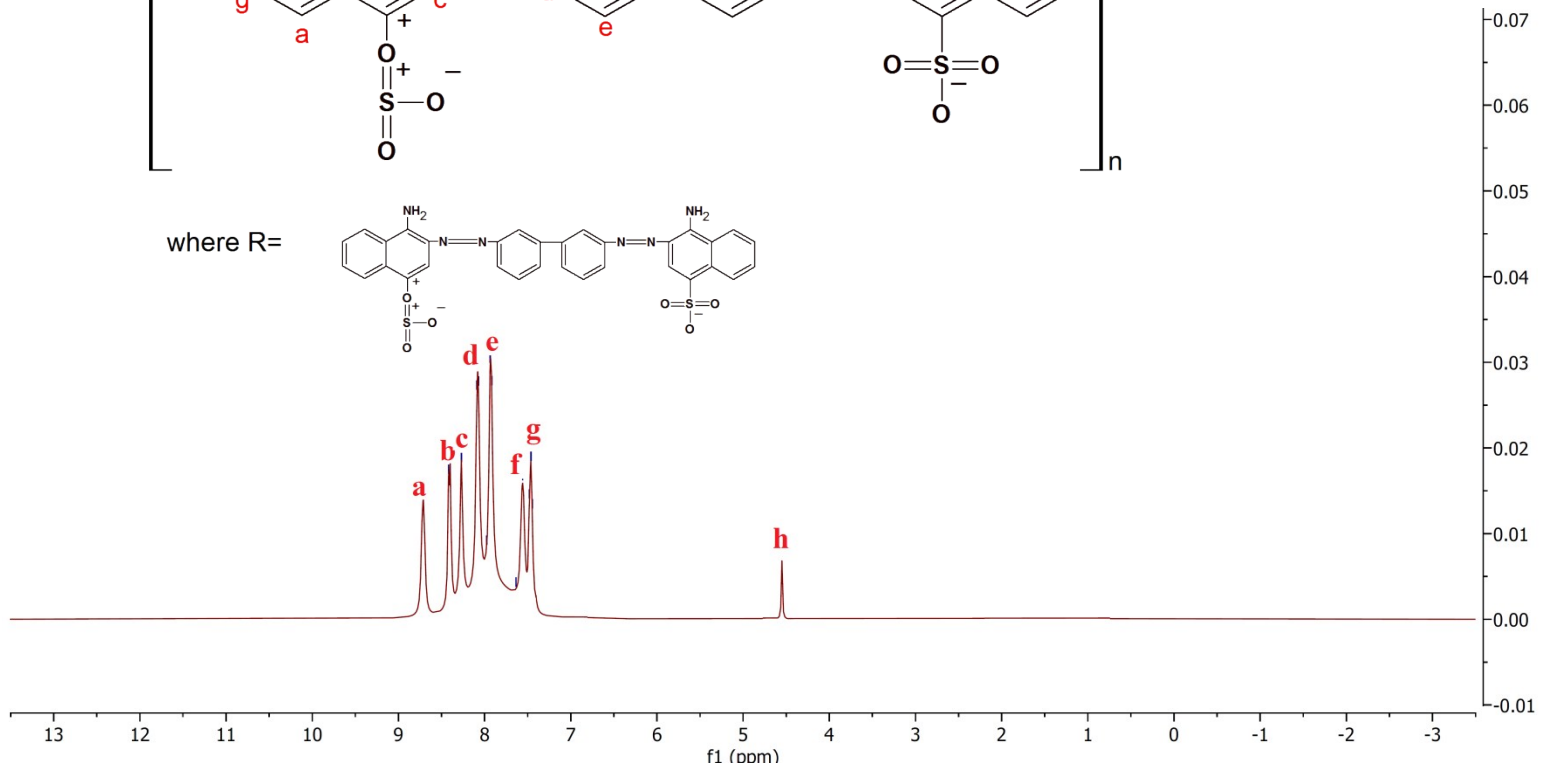

(b)

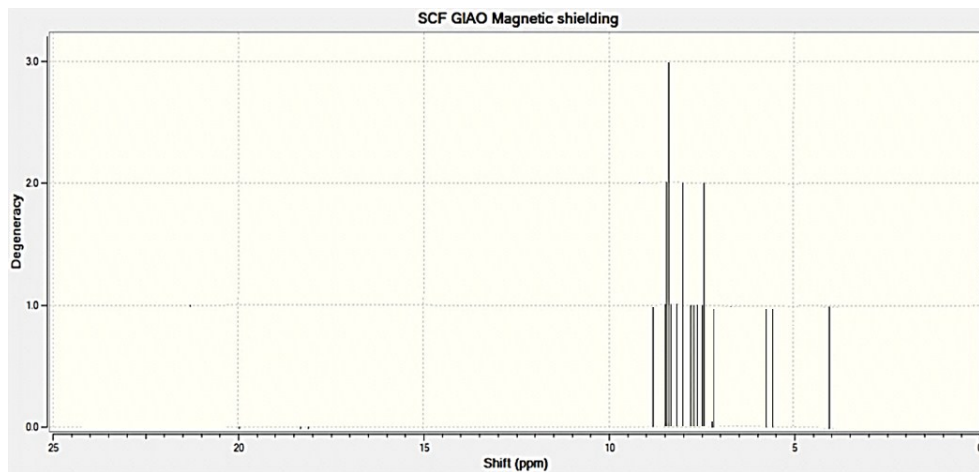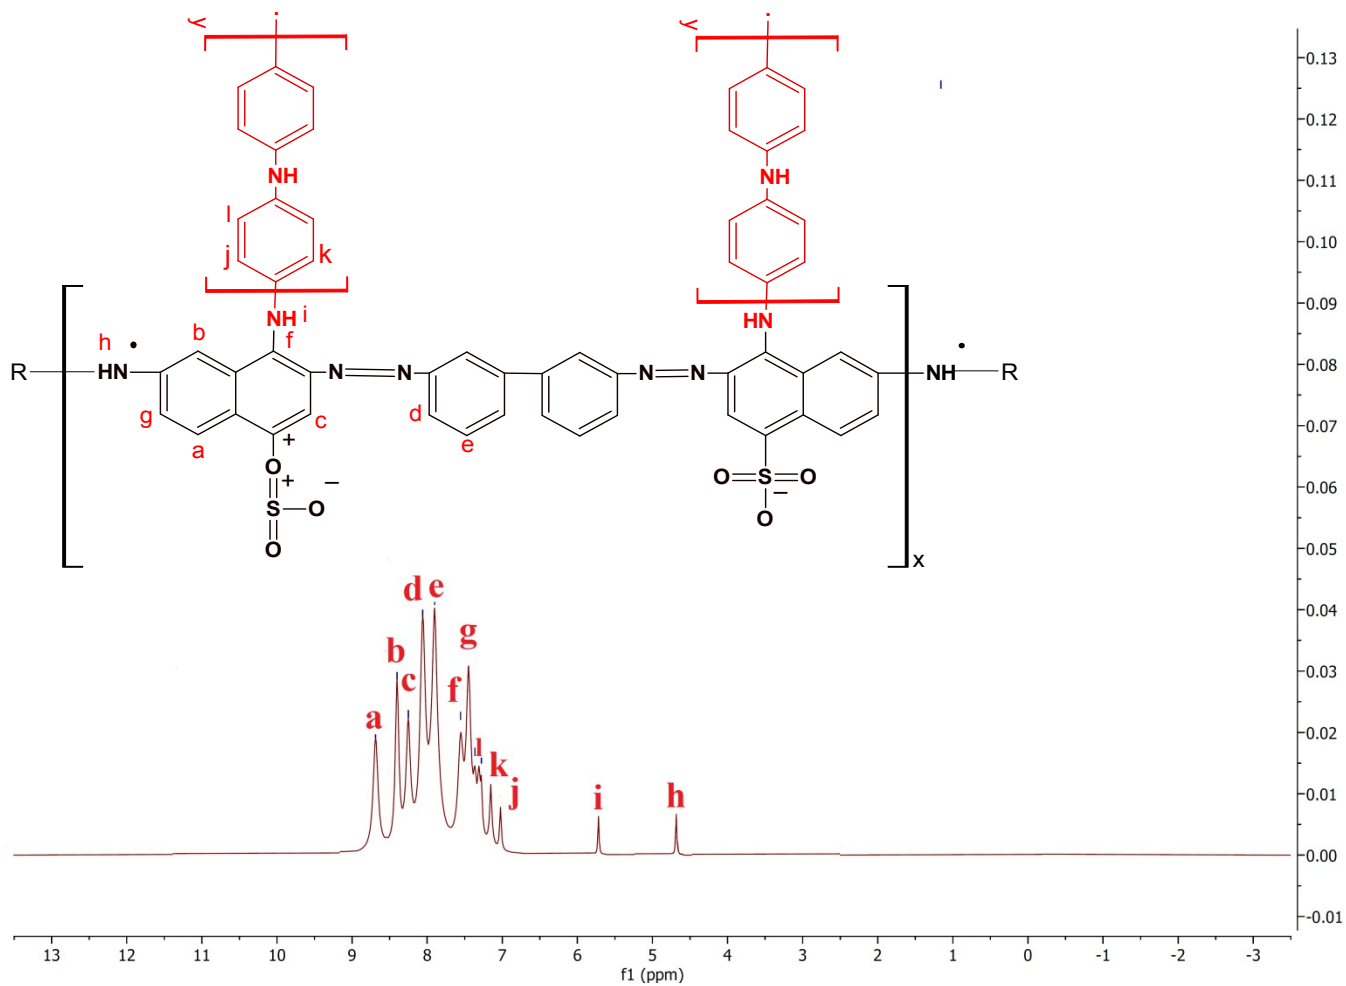

(c)

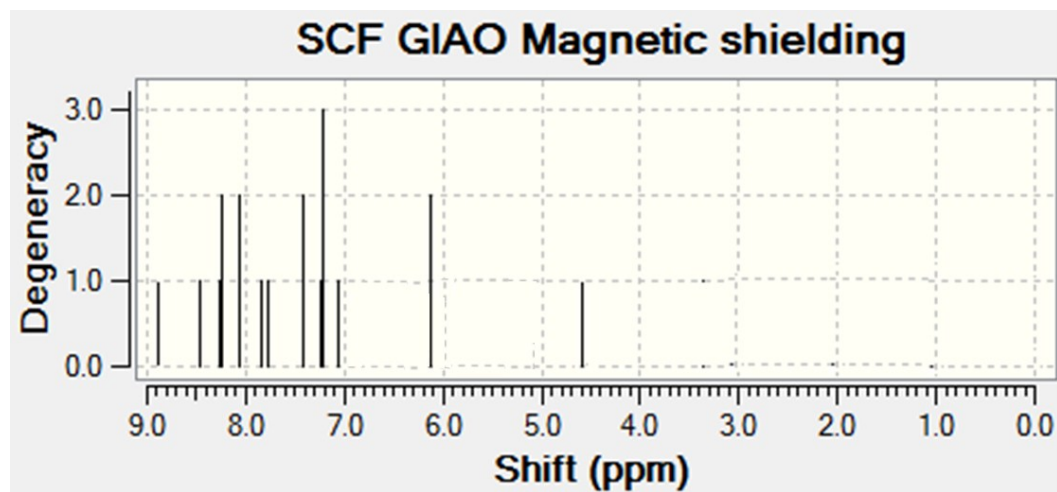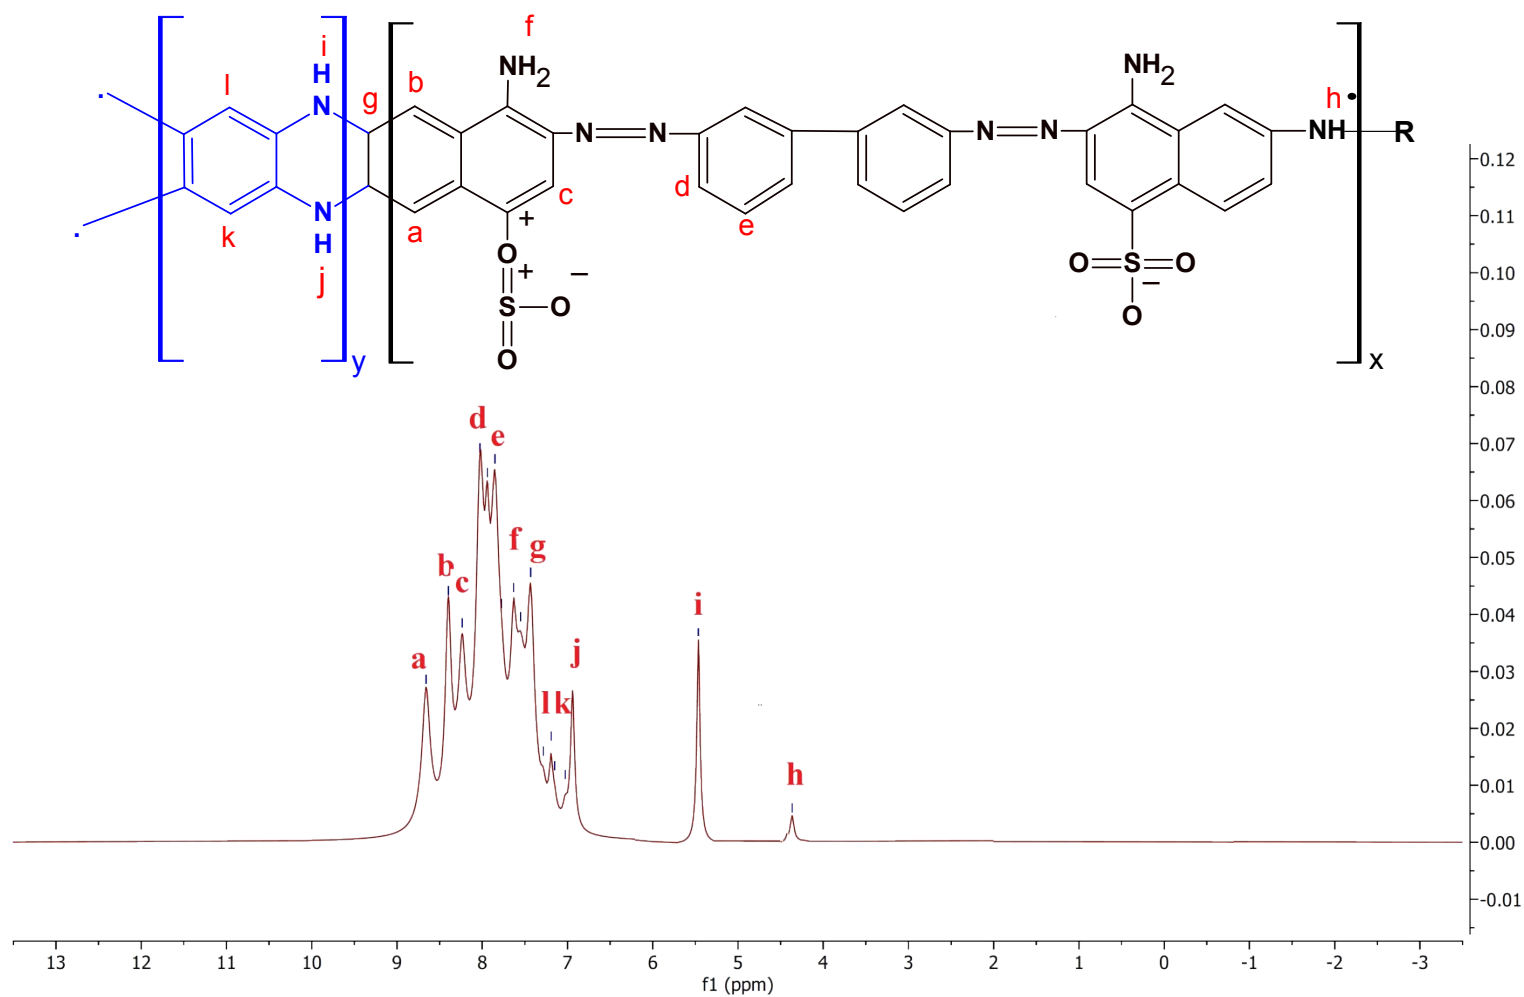

Figure S1  $^1\text{H-NMR}$  spectra of (a) PCR (b) PCR-co-PANI, (c) PCR-co-POPd

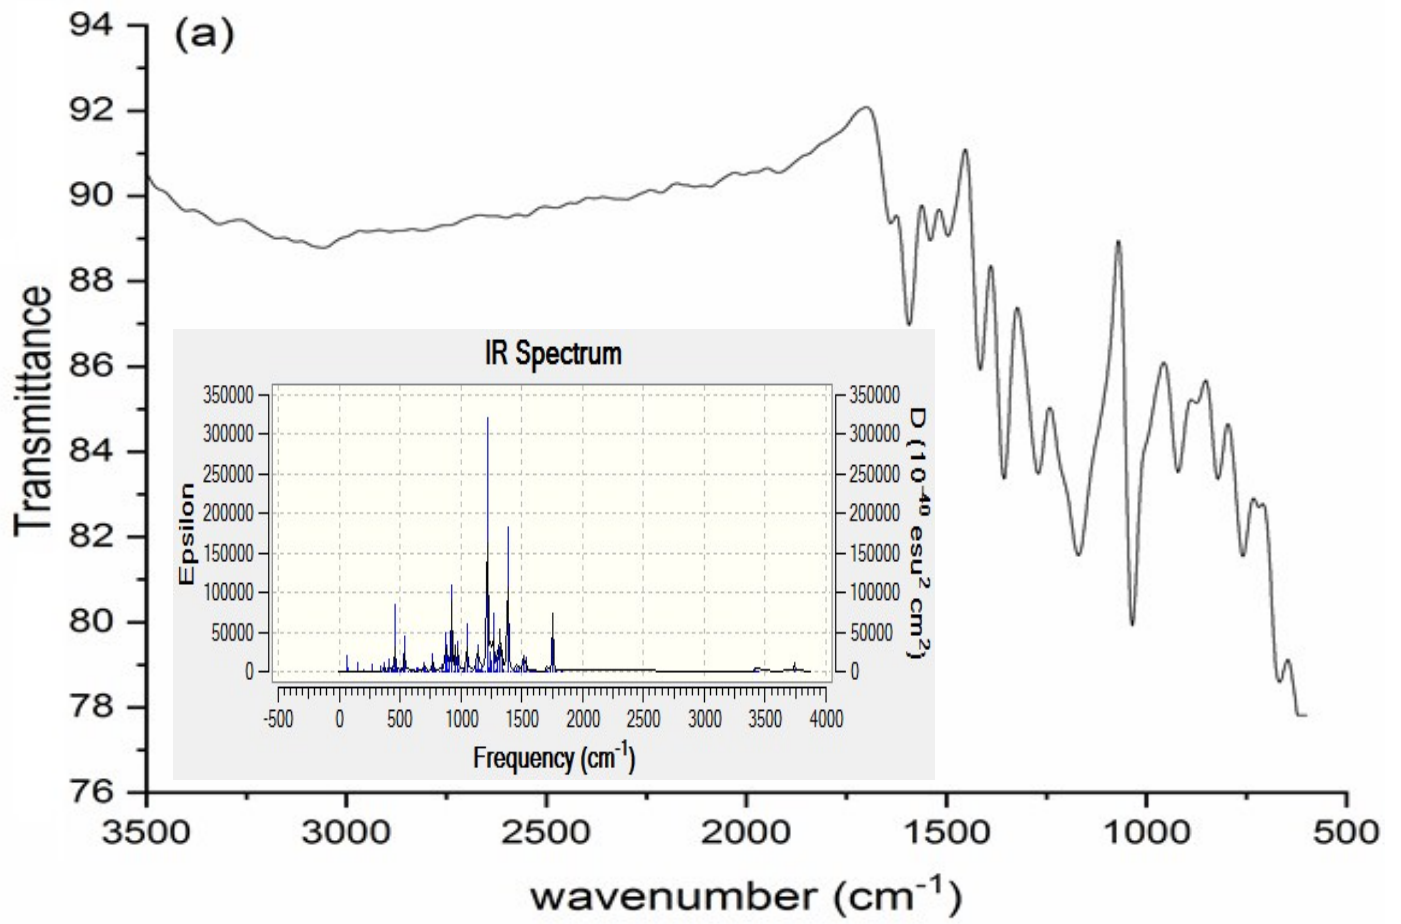

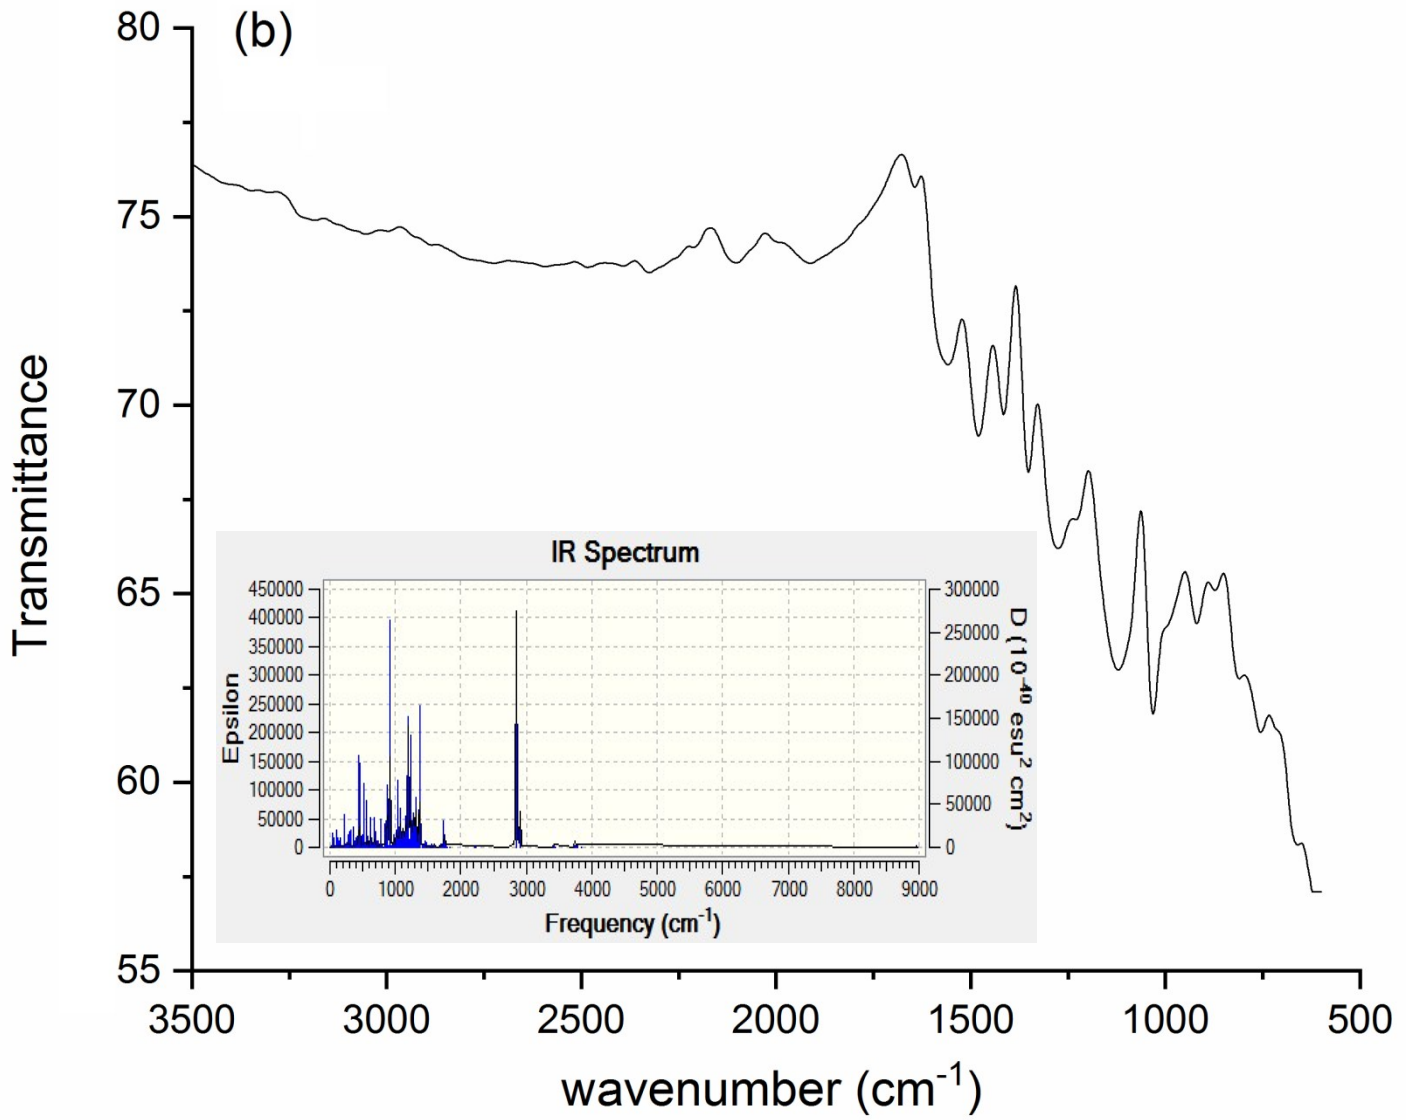

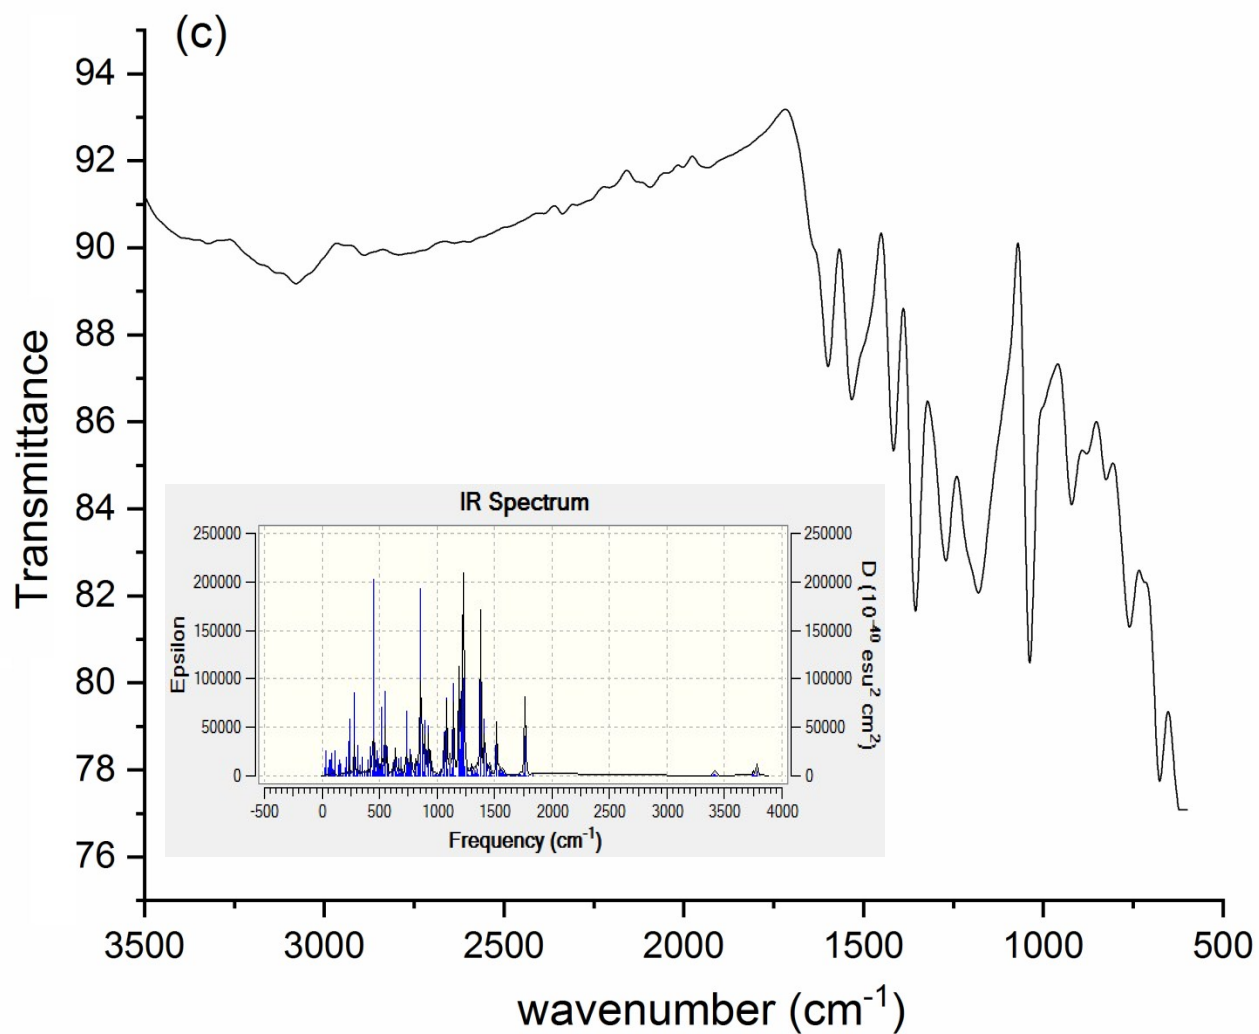

Figure S2 IR spectra of (a) PCR (b) PCR-co-PANI, (c) PCR-co-POPD



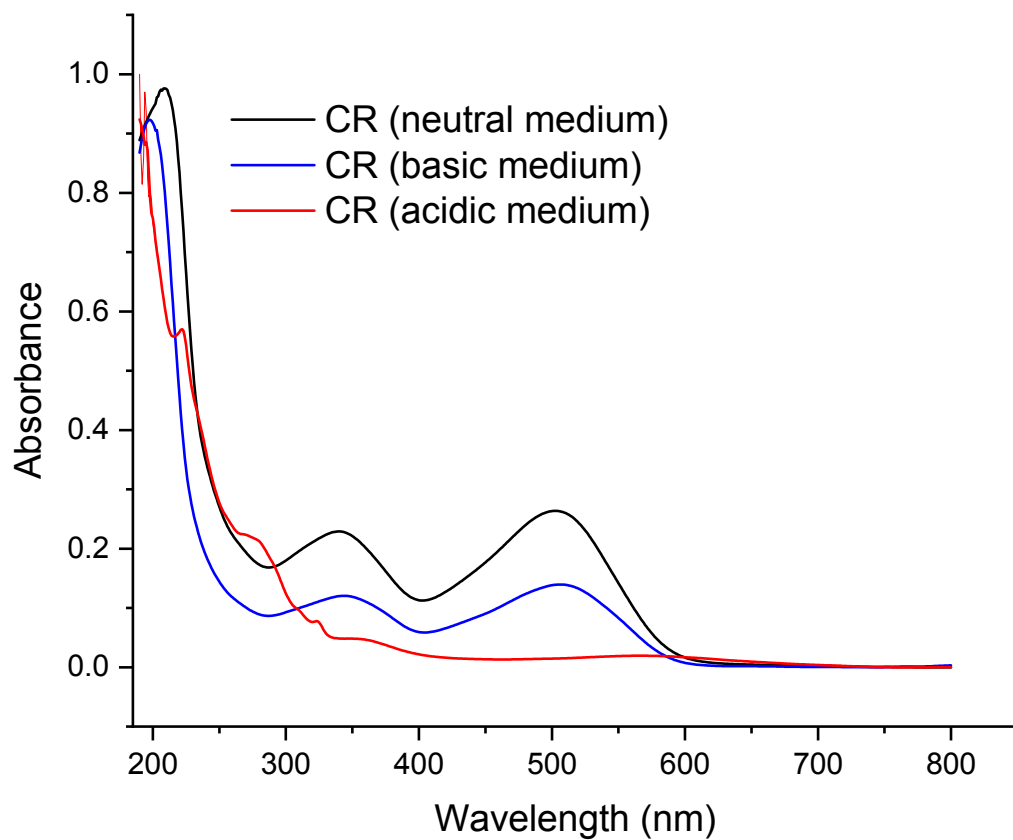

**Figure S3 UV –visible spectra of Congo Red in acidic, basic and neutral media**

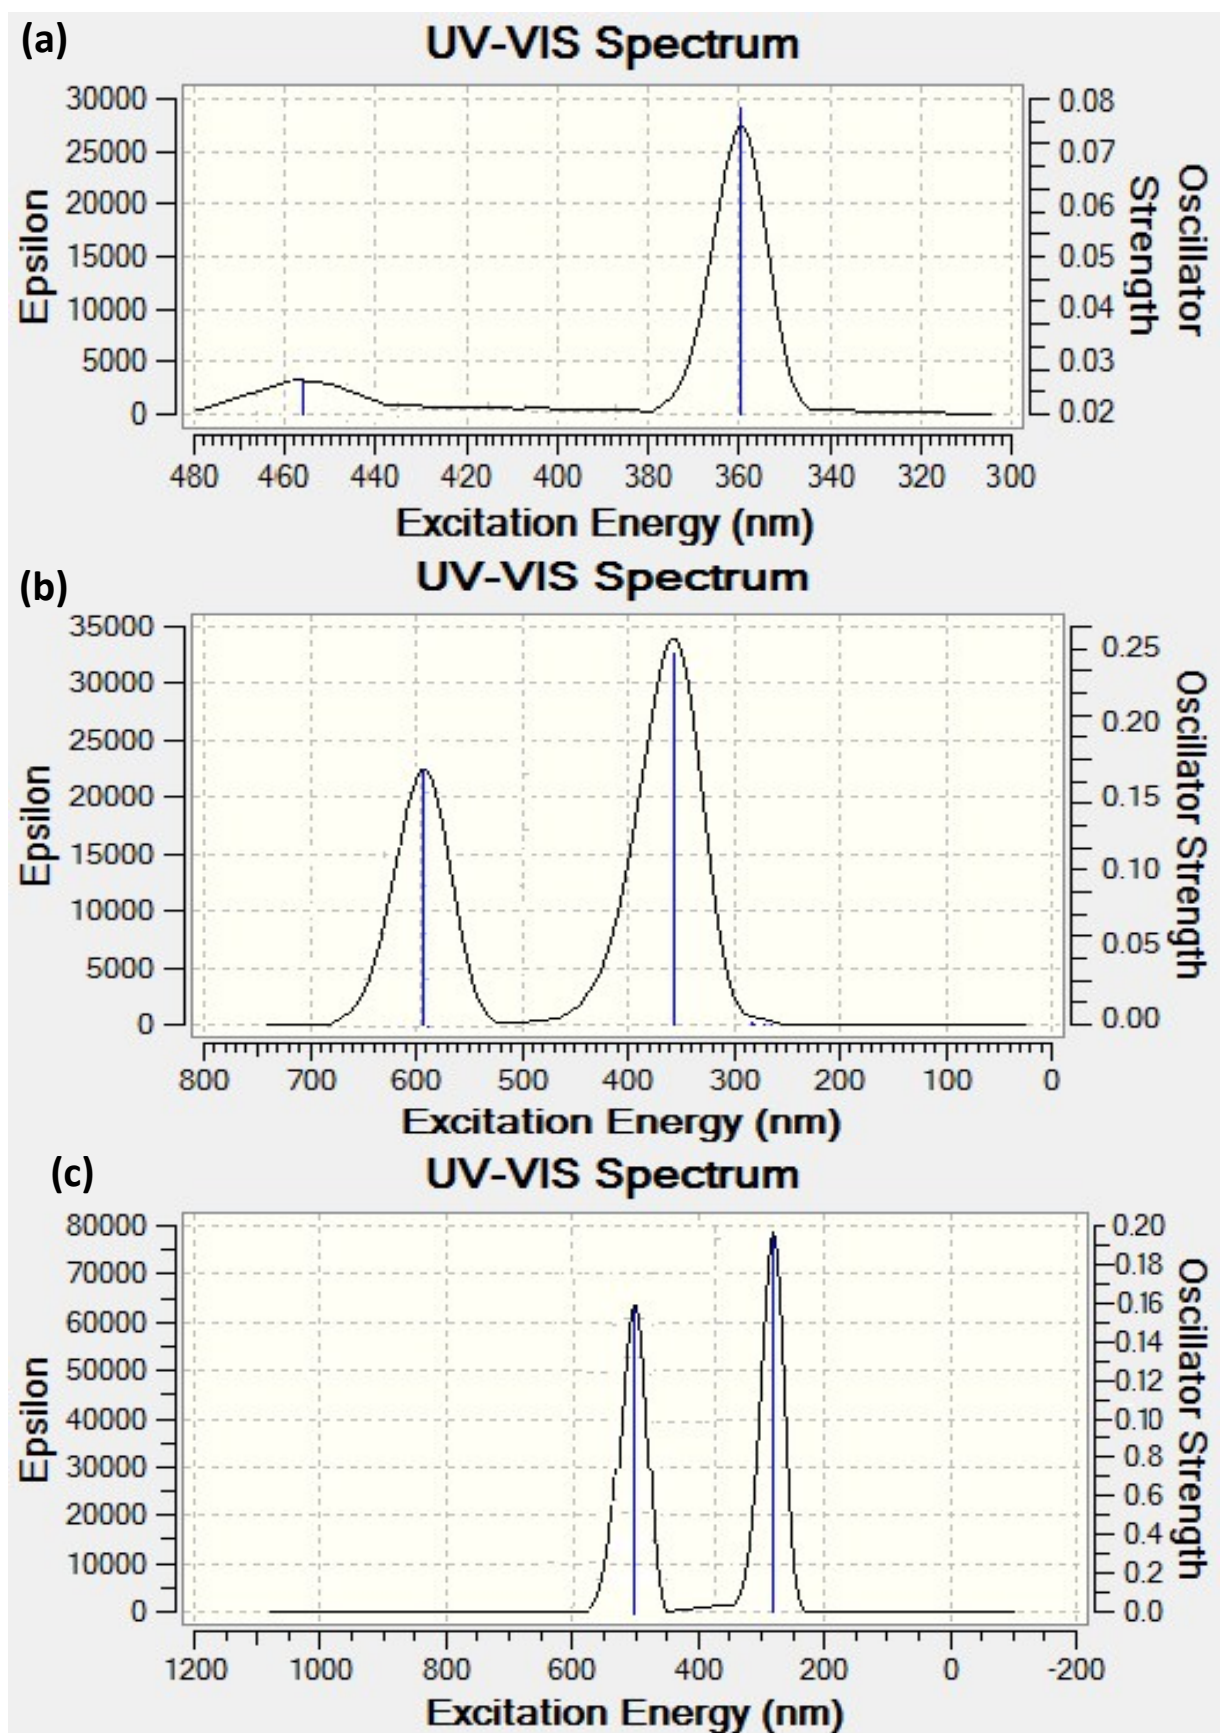

Figure S4 Theoretical UV –visible spectra of (a) PCR,(b) PCR-co-PANI, (c) PCR-co-POPD
